# Supplementary material for: Ultra-high performance humidity sensor enabled by a self-assembled CuO/Ti3C2TX MXene
Source: RSC Adv. 2023 Feb 21;13(9):6264–73. doi: 10.1039/d2ra06903b (PMC9942262; doi:10.1039/d2ra06903b)
Supplement: RA-013-D2RA06903B-s001 [file RA-013-D2RA06903B-s001.pdf]

## Supporting Information

### **Ultra-high performance humidity sensor enabled by self-assembled CuO/Ti<sub>3</sub>C<sub>2</sub>T<sub>x</sub> MXene**

*Lei Wang, <sup>a,b</sup> Xinqi Yao, <sup>a,b</sup> Shuaishuai Yuan, <sup>a,b</sup> Yang Gao, <sup>b</sup> Ruhang Zhang, <sup>a,b</sup> Xinhai Yu, <sup>\*a,b</sup> Shan-Tung Tu <sup>a,b</sup> and Shijian Chen <sup>c</sup>*

<sup>a</sup> MOE Key Laboratory of Pressure Systems and Safety, East China University of Science and Technology, Shanghai 200237, P.R. China

<sup>b</sup> School of Mechanical and Power Engineering, East China University of Science and Technology, Shanghai 200237, P.R. China

<sup>c</sup> SUFA Technology Industry Co., Ltd., CNNC, Suzhou, 215001, P.R. China

\*Corresponding author.

E-mail: yxhh@ecust.edu.cn (Xinhai Yu)

## Materials information

Hydrochloric acid (HCl) and lithium fluoride (LiF) obtained from Sinopharm Chemical Reagent Co., Ltd, China.  $\text{Ti}_3\text{AlC}_2$  obtained from FoShan XinXi Technology Co., Ltd, China. Copper oxalate ( $\text{CuC}_2\text{O}_4$ ), tetrahydrofuran (THF),  $\text{P}_2\text{O}_5$ ,  $\text{CaCl}_2$ ,  $\text{LiCl}$ ,  $\text{CH}_3\text{COOK}$ ,  $\text{MgCl}_2$ ,  $\text{K}_2\text{CO}_3$ ,  $\text{Mg}(\text{NO}_3)_2$ ,  $\text{CuCl}_2$ ,  $\text{NaCl}$ ,  $\text{KCl}$ , and  $\text{K}_2\text{SO}_4$  obtained from Shanghai Macklin Biochemical Co., Ltd, China.

## Supporting Figures

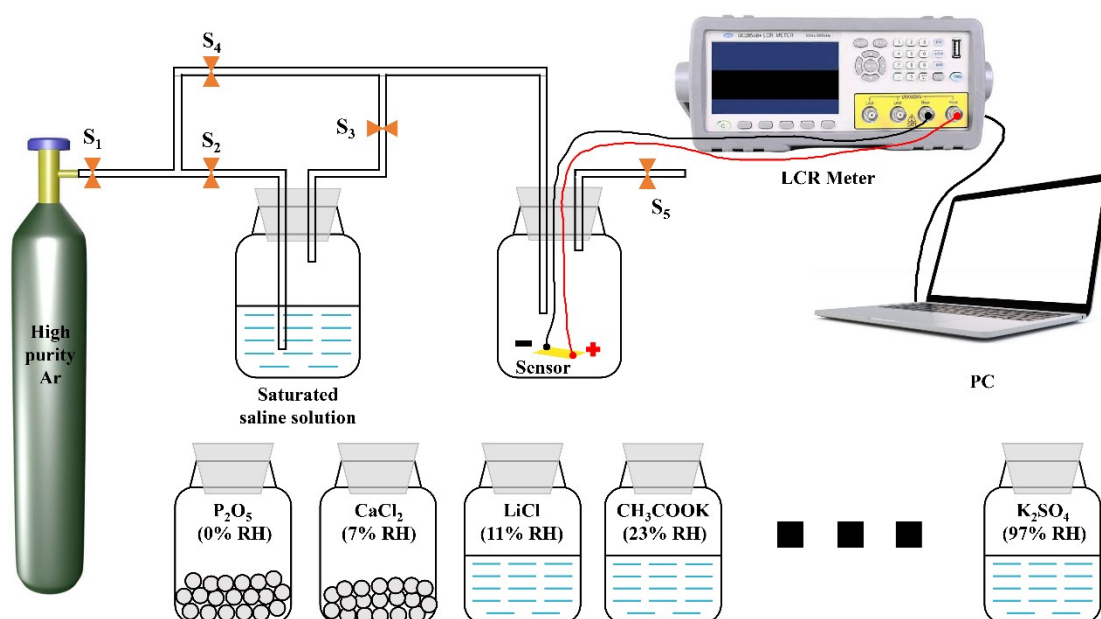

**Fig. S1.** Schematic diagram of humidity sensing experimental setup.

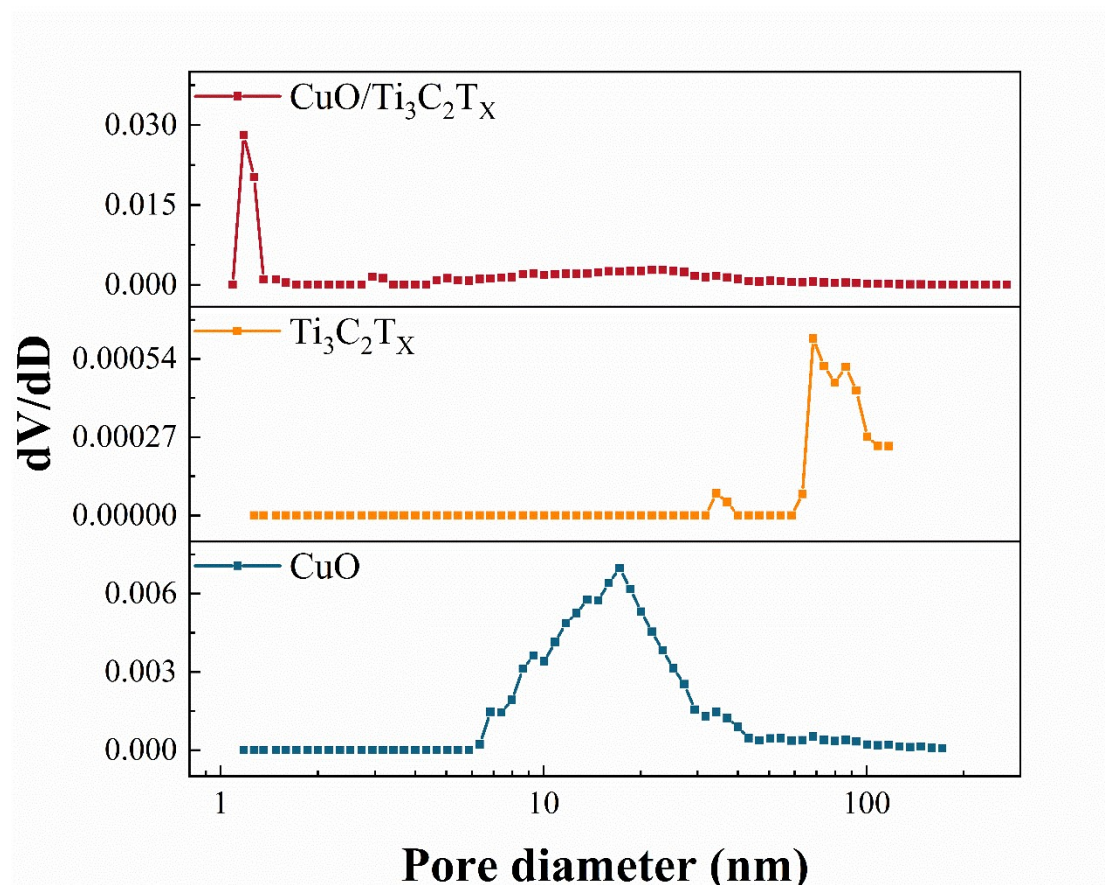

**Fig. S2.** Pore size distributions of CuO/Ti<sub>3</sub>C<sub>2</sub>T<sub>x</sub> composites, pure Ti<sub>3</sub>C<sub>2</sub>T<sub>x</sub>, and pure CuO.

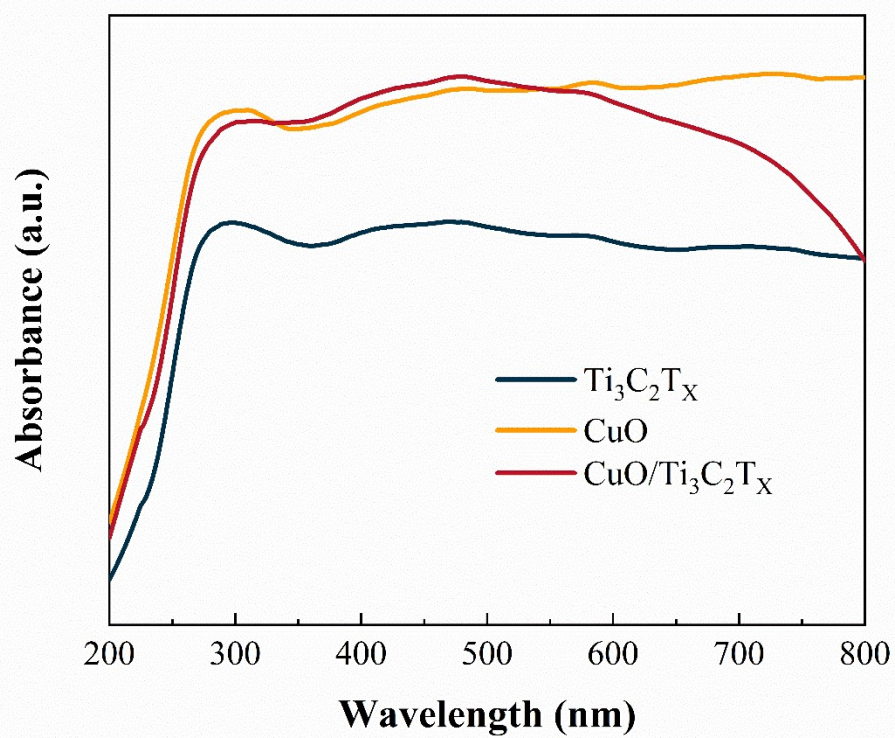

**Fig. S3.** UV-Vis spectra of  $\text{CuO}/\text{Ti}_3\text{C}_2\text{T}_x$  composites, pure  $\text{Ti}_3\text{C}_2\text{T}_x$ , and pure  $\text{CuO}$ , respectively.

A straight line equation with intercept  $E_g$  is used to draw the Tauc plot and calculate the band gap values for the three samples: <sup>1,2</sup>

$$(\alpha h\nu)^{1/n} = A (h\nu - E_g) \quad (1)$$

where ' $\alpha$ ' is the absorption coefficient, ' $h\nu$ ' represents the energy of the photon, ' $A$ ' is a constant value,  $E_g$  represents the band gap energy, and ' $n$ ' represents the type of transition, i.e., direct, indirect, allowed, or forbidden. The indirect band gap energies of the fabricated materials were calculated by extrapolating the plot of  $(\alpha h\nu)^{1/2}$  versus  $h\nu$  as shown in Figs. S4, S5, and S6. The band gap values of  $Ti_3C_2T_X$ , CuO, and CuO/ $Ti_3C_2T_X$  composites were 1.8, 1.7, and 1.55 eV, respectively.

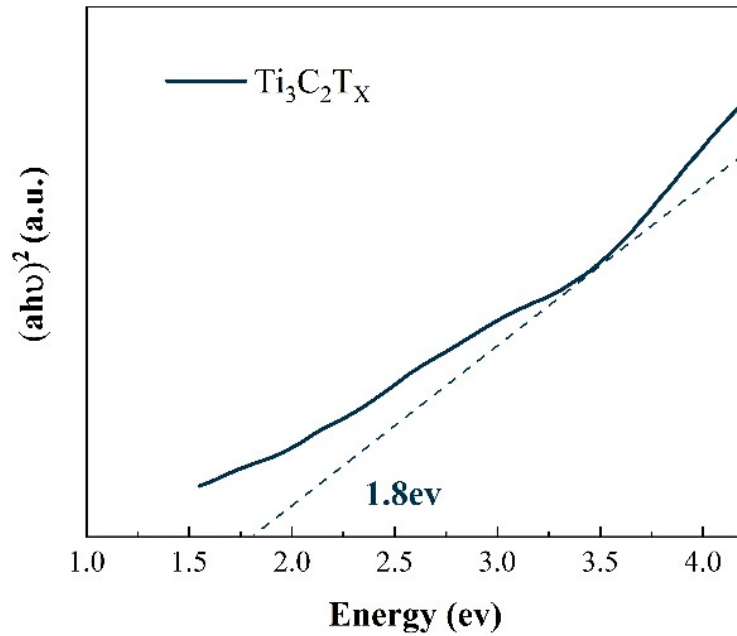

**Fig. S4.** Tauc plot of  $Ti_3C_2T_X$ .

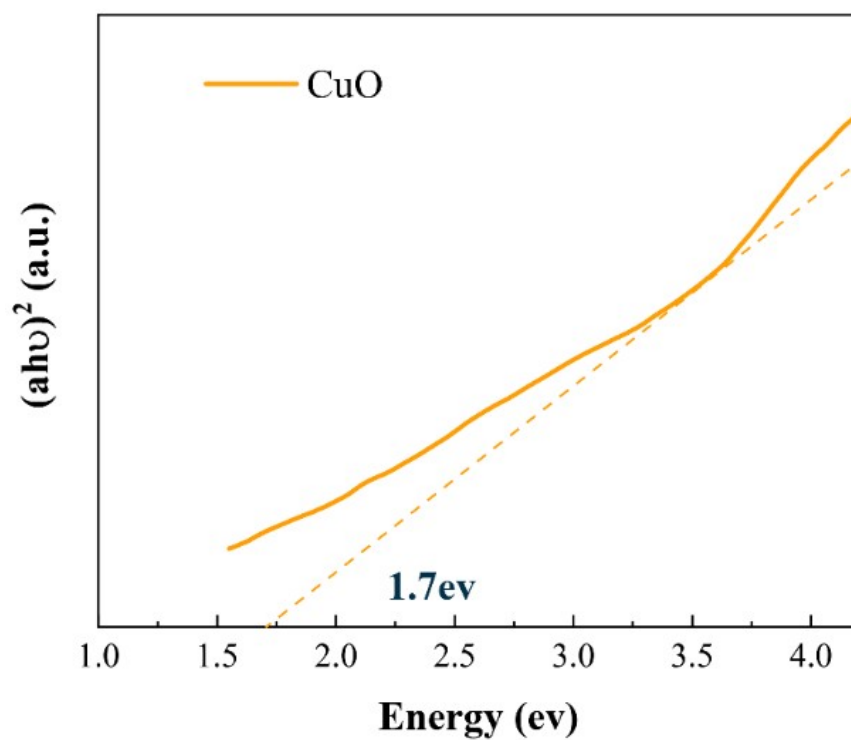

**Fig. S5.** Tauc plot of CuO.

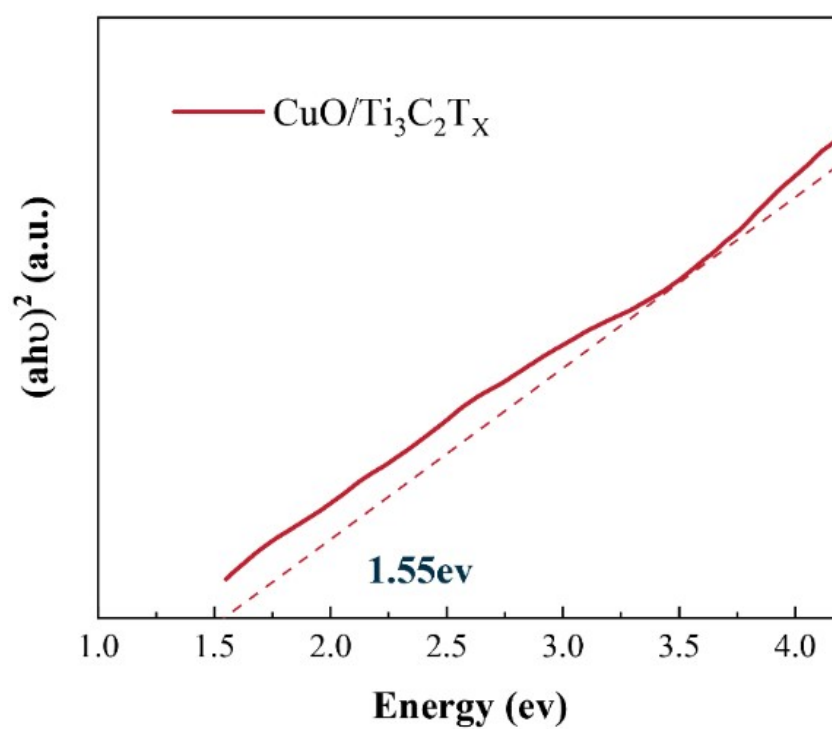

**Fig. S6.** Tauc plot of CuO/Ti<sub>3</sub>C<sub>2</sub>T<sub>x</sub>.

## Supporting Table

**Table S1** Humidity sensing sensitivity values of CuO and Ti<sub>3</sub>C<sub>2</sub>T<sub>x</sub> composites with different ratios.

| Samples     | A1         | A2         | A3         | A4        |
|-------------|------------|------------|------------|-----------|
| Sensitivity | 217 kΩ/%RH | 451 kΩ/%RH | 227 kΩ/%RH | 98 kΩ/%RH |

## References

- 1 Bashir B., Khalid M. U., Aadil M., Zulfiqar S., Warsi M. F., Agboola P. O. and Shakir I, *Ceram. Int.*, 2021, **47**, 3603-3613.
- 2 Alsafari I.A, *Ceram. Int.*, 2022, **48**, 10960-10968.
